# Supplementary material for: Relationships between Interaction Energy and Electron Density Properties for Homo Halogen Bonds of the [(A)nY–X···X–Z(B)m] Type (X = Cl, Br, I)
Source: MDPI journal article supplement (doi:10.3390/molecules24152733), 2019-07-27
Supplement: s1 [file s1]

# Relationships between interaction energy and electron density properties for homo-halogen bonds of the $[(A)_nY-X\cdots X-Z(B)_m]$ type (X = Cl, Br, I)

Maxim L. Kuznetsov

Centro de Química Estrutural, Instituto Superior Técnico, Universidade de Lisboa, Avenida Rovisco Pais, Lisboa 1049-001, Portugal; max@mail.ist.utl.pt

## Supplementary Material

### *Effect of BSSE*

The effect of basis set superposition error may play a very important role, in particular, for relatively small basis sets. As can be seen from Figure S3,A–C, the BSSE effect is insignificant for structures of the Cl $\cdots$ Cl type,  $E_{\text{int}}$  values with and without CP correction being similar. Three points corresponding to structures bearing the heavier Br atom (Br–Cl $\cdots$ Cl–H, Br–Cl $\cdots$ Cl–F, and F–Cl $\cdots$ Cl–Br) are out of the trend. For the I $\cdots$ I structures, there is also a very good correlation of  $E_{\text{int}}^{\text{with CP}}$  against  $E_{\text{int}}^{\text{without CP}}$ . However, the BSSE effect here is significant with the slope of the correlation being 0.78 and the intercept of –1.61. For the Br $\cdots$ Br structures, there is no reasonable correlation between  $E_{\text{int}}$  with and without CP correction demonstrating the extreme importance of BSSE for the structures of this type for the 6-31+G\* basis set. Such different behavior of the Br $\cdots$ Br and I $\cdots$ I structures may be accounted for by the different basis sets used for their calculations (6-31+G\* and DZP, respectively).

In accord with the CP correction values, the  $E_{\text{int}}(V_b)$  relationships are very similar for both corrected and uncorrected  $E_{\text{int}}$  in the case of the Cl $\cdots$ Cl structures (Figure S3,D). For the I $\cdots$ I structures, the  $-E_{\text{int}}^{\text{with CP}}(-V_b)$  and  $-E_{\text{int}}^{\text{without CP}}(-V_b)$  correlations have close curvature and horizontal vertex positions but the former function has the intercept point lower by *ca.* 2 kcal/mol compared to the latter function (Figure S3,F). The  $E_{\text{int}}^{\text{without CP}}(V_b)$  relationship for the Br $\cdots$ Br structures (Figure S3,E) has poor MAD value (0.78 kcal/mol) and, therefore, the BSSE correction is crucial for these types of structure and basis set.

**Table S1.** Calculated structures  $[(A)_nY-X\cdots X-Z(B)_m]$  (**A**, **B** and **C** mean structures  $[(A)_nY-X\cdots X-H]$ ,  $[(A)_nY-X\cdots X-F]$  and  $[F-X\cdots X-Z(B)_m]$ , respectively, structures included into the analysis are marked as “V”, structures for which an equilibrium geometry was not found or those with not appropriate geometry are marked as “X”).

| $(A)_nY$ or $Z(B)_m$                                                                | X = Cl |   |   | X = Br |   |   | X = I |   |   |
|-------------------------------------------------------------------------------------|--------|---|---|--------|---|---|-------|---|---|
|                                                                                     | A      | B | C | A      | B | C | A     | B | C |
| <b>Z = Hal</b>                                                                      |        |   |   |        |   |   |       |   |   |
| F–                                                                                  | V      | V | V | V      | V | V | V     | V | V |
| Cl–                                                                                 | V      | V | V | V      | V | V | V     | V | V |
| Br–                                                                                 | V      | V | V | V      | V | V | V     | V | V |
| <b>Z = C (sp<sup>3</sup>)</b>                                                       |        |   |   |        |   |   |       |   |   |
| Me–                                                                                 | X      | X | X | X      | V | V | V     | V | V |
| H <sub>2</sub> (Me)C–                                                               | X      | X | X | V      | V | V | V     | V | V |
| H(Me) <sub>2</sub> C–                                                               | X      | X | X | V      | V | V | V     | X | X |
| Me <sub>3</sub> C–                                                                  | X      | X | X | V      | V | V | V     | X | X |
| H <sub>2</sub> FC–                                                                  | V      | V | V | V      | V | V | V     | V | V |
| H(F) <sub>2</sub> C–                                                                | V      | V | V | V      | V | V | V     | V | V |
| F <sub>3</sub> C–                                                                   | V      | V | V | V      | V | V | V     | V | V |
| N≡C–CH <sub>2</sub> –                                                               | X      | V | V | V      | V | V | V     | V | V |
| (N≡C) <sub>2</sub> CH–                                                              | V      | V | V | V      | V | V | V     | X | X |
| (N≡C) <sub>3</sub> C–                                                               | V      | V | V | X      | V | V | V     | X | V |
| <b>Z = C (sp<sup>2</sup>)</b>                                                       |        |   |   |        |   |   |       |   |   |
| H <sub>2</sub> C=CH–                                                                | X      | X | X | V      | V | V | V     | V | X |
| FCH=CH–                                                                             | X      | X | V | V      | V | V | V     | V | V |
| F <sub>2</sub> C=CH–                                                                | V      | X | V | V      | V | V | V     | V | V |
| F <sub>2</sub> C=CF–                                                                | V      | V | V | V      | V | V | V     | V | V |
| F <sub>3</sub> C(H)C=CH–                                                            | X      | X | V | X      | V | V | V     | V | V |
| (F <sub>3</sub> C) <sub>2</sub> C=CH–                                               | X      | X | V | X      | V | V | V     | V | V |
| H(O=C)–                                                                             | X      | X | X | X      | V | X | V     | X | V |
| Me(O=C)–                                                                            | X      | X | X | X      | V | X | V     | X | V |
| (MeO)(O=C)–                                                                         | V      | V | V | V      | X | V | V     | X | V |
| Ph–                                                                                 | X      | X | V | V      | V | V | V     | V | V |
| 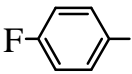 | X      | X | V | V      | V | V | V     | V | V |
|  | V      | V | V | V      | V | V | V     | V | V |
|  | V      | V | V | V      | V | V | V     | V | V |
|  | V      | V | V | V      | V | V | V     | V | V |
|  | X      | X | X | V      | V | V | V     | V | X |

|                                                                                     |   |   |   |   |   |   |   |   |   |
|-------------------------------------------------------------------------------------|---|---|---|---|---|---|---|---|---|
| 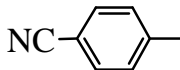    | V | V | V | X | V | V | V | V | X |
|    | V | V | V | X | V | V | V | V | V |
|    | V | V | V | X | V | V | V | V | V |
|    | V | V | V | X | V | V | X | V | V |
|    | V | X | V | X | V | X | V | V | V |
| <b>Z = C (sp)</b>                                                                   |   |   |   |   |   |   |   |   |   |
| H-C≡C-                                                                              | V | V | V | V | V | V | V | V | V |
| Me-C≡C-                                                                             | V | V | V | V | V | V | V | V | V |
| F-C≡C-                                                                              | V | V | V | V | V | V | V | V | V |
| Cl-C≡C-                                                                             | V | V | V | V | V | V | V | V | V |
| F <sub>3</sub> C-C≡C-                                                               | V | V | V | V | V | V | V | V | V |
| N≡C-                                                                                | V | V | V | X | V | V | V | V | V |
| <b>Z = N</b>                                                                        |   |   |   |   |   |   |   |   |   |
| H <sub>2</sub> N-                                                                   | X | V | V | V | V | V | V | V | V |
| Me <sub>2</sub> N-                                                                  | X | X | V | V | V | V | V | V | X |
| H(Ph)N-                                                                             | X | V | V | V | V | V | V | V | X |
| Ph <sub>2</sub> N-                                                                  | X | X | V | V | V | X | V | X | X |
|  | X | V | V | V | V | V | V | X | X |
|  | X | V | V | V | V | V | V | X | X |
|  | X | X | V | V | X | V | V | X | X |
|  | V | V | V | V | V | V | V | X | V |

|                        |   |   |   |   |   |   |   |   |   |
|------------------------|---|---|---|---|---|---|---|---|---|
|                        | X | X | V | V | V | X | V | X | X |
|                        | X | X | V | V | V | X | V | X | X |
| O=N-                   | X | X | X | V | V | V | V | V | X |
| H <sub>2</sub> C=N-    | V | V | V | V | V | V | V | V | V |
| F <sub>2</sub> C=N-    | V | V | V | V | V | V | V | V | V |
| Me <sub>2</sub> C=N-   | X | X | X | X | V | X | V | V | V |
| O <sub>2</sub> N-      | V | V | V | V | V | V | V | V | X |
| <b>Z = S</b>           |   |   |   |   | V |   |   |   |   |
|                        | V | V | V | X | V | V | V | V | V |
|                        | V | V | V | V | V | V | V | V | V |
|                        | V | V | V | X | V | V | V | X | X |
|                        | V | V | V | V | V | V | X | V | V |
|                        | V | V | V | V | V | V | V | V | V |
| Me(O=)S-               | X | V | X | X | V | V | V | V | X |
| F <sub>3</sub> C(O=)S- | V | V | V | V | V | V | V | V | V |
| Cl(O=)S-               | V | V | V | X | V | V | V | V | V |
| N≡C(O=)S-              | V | V | V | V | V | V | V | X | X |
| <b>Z = P</b>           |   |   |   |   |   |   |   |   |   |
| H <sub>2</sub> P-      | X | X | X | X | V | V | V | V | V |
| H(F)P-                 | V | X | X | X | V | V | V | V | V |
| F <sub>2</sub> P-      | V | X | V | X | V | V | V | V | V |
| Me <sub>2</sub> P-     | X | X | X | V | X | V | V | V | V |
| Cl <sub>2</sub> (O=)P- | V | V | V | V | V | V | V | V | V |
| F <sub>2</sub> (O=)P-  | V | V | V | V | V | V | V | V | V |
| H <sub>2</sub> (O=)P-  | V | X | X | X | V | X | V | V | V |

|                                                                                     |   |   |   |   |   |   |   |   |   |
|-------------------------------------------------------------------------------------|---|---|---|---|---|---|---|---|---|
| H(F)(O=)P–                                                                          | V | V | V | V | V | V | V | V | X |
| (F <sub>3</sub> C) <sub>2</sub> (=O)P–                                              | V | V | V | X | X | X | V | V | V |
| <b>Z = B</b>                                                                        |   |   |   |   |   |   |   |   |   |
| F <sub>2</sub> B–                                                                   | X | V | V | X | V | X | V | V | V |
| H <sub>2</sub> B–                                                                   | X | V | X | X | X | V | V | V | X |
| H(F)B–                                                                              | X | V | V | X | V | X | V | V | V |
| H(HO)B–                                                                             | X | X | X | X | V | X | V | V | V |
| <b>Z = Si</b>                                                                       |   |   |   |   |   |   |   |   |   |
| Me <sub>3</sub> Si–                                                                 | X | X | X | X | X | X | V | V | V |
| F <sub>3</sub> Si–                                                                  | V | V | V | V | X | V | V | V | V |
| H <sub>3</sub> Si–                                                                  | X | V | X | X | V | X | V | V | V |
| H <sub>2</sub> (F)Si–                                                               | X | V | X | X | V | V | V | V | V |
| H(F) <sub>2</sub> Si–                                                               | X | V | X | V | X | V | V | V | V |
| <b>Z = O</b>                                                                        |   |   |   |   |   |   |   |   |   |
| HO–                                                                                 | V | V | V | V | V | V | V | V | V |
| MeO–                                                                                | V | V | V | V | V | V | V | V | X |
| PhO–                                                                                | V | V | V | V | V | V | V | V | X |
| 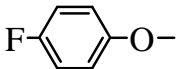   | V | V | V | V | V | V | V | V | X |
|    | V | V | V | V | V | V | V | V | V |
|   | V | V | V | V | V | V | V | V | V |
|  | V | V | V | V | V | V | V | V | V |
|  | V | V | V | V | V | V | V | X | V |
| <b>Z = H</b>                                                                        |   |   |   |   |   |   |   |   |   |
| H                                                                                   | X | X | V | X | V | X | V | V | V |

**Table S2.** Negative X...X interaction energies,  $-E_{\text{int}}$ , with BSSE correction calculated for the  $[(A)_nY-X...X-Z(B)_m]$  structures at the M06-2X/6-31+G\* (X = Cl, Br) and M06-2X/DZP (X = I) levels.

| $[(A)_nY-X...X-Z(B)_m]$                                 | X = Cl | X = Br | X = I |
|---------------------------------------------------------|--------|--------|-------|
| F-X...X-H                                               | 2.51   | 3.95   | 4.85  |
| Cl-X...X-H                                              | 1.47   | 2.43   | 3.45  |
| Br-X...X-H                                              | 1.09   | 2.12   | 3.26  |
| HO-X...X-H                                              | 1.49   |        |       |
| HO-X...X-H                                              | 1.47   | 1.94   | 2.26  |
| H <sub>2</sub> N-X...X-H                                |        | 1.32   | 1.00  |
| H <sub>2</sub> N-X...X-H                                |        |        |       |
| H-X...X-H                                               |        |        | 0.22  |
| FH <sub>2</sub> C-X...X-H                               | 0.40   | 0.40   | 0.12  |
| F <sub>2</sub> HC-X...X-H                               | 0.42   | 0.59   | 0.37  |
| F <sub>3</sub> C-X...X-H                                | 0.78   | 0.82   | 0.86  |
| HCC-X...X-H                                             | 0.78   |        |       |
| HCC-X...X-H                                             | 0.75   | 1.09   | 1.07  |
| Ph-X...X-H                                              |        |        | 0.19  |
| C <sub>6</sub> F <sub>5</sub> -X...X-H                  | 0.63   | 0.93   | 1.08  |
| H <sub>2</sub> N-Ph-X...X-H                             |        |        | 0.92  |
| F-Ph-X...X-H                                            |        |        | 0.30  |
| MeCC-X...X-H                                            | 0.76   |        | 0.78  |
| MeCC-X...X-H                                            | 0.58   | 1.00   |       |
| FCC-X...X-H                                             | 0.77   | 1.14   | 1.19  |
| MeO-X...X-H                                             | 0.97   | 1.73   | 2.03  |
| Me <sub>2</sub> N-X...X-H                               |        |        | 0.43  |
| Me <sub>2</sub> N-X...X-H                               |        |        | 0.52  |
| C <sub>6</sub> F <sub>2</sub> OH <sub>2</sub> H-X...X-H | 0.83   |        | 0.81  |
| C <sub>6</sub> F <sub>2</sub> OH <sub>2</sub> H-X...X-H | 0.75   |        |       |
| NCSO <sub>2</sub> -X...X-H                              | 1.17   | 1.64   | 2.33  |
| ClSO <sub>2</sub> -X...X-H                              | 1.01   | 1.65   | 2.46  |
| H <sub>2</sub> NSO <sub>2</sub> -X...X-H                | 0.48   | 0.84   | 0.96  |
| F <sub>3</sub> CSO <sub>2</sub> -X...X-H                | 0.82   | 1.26   | 1.59  |
| MeSO-X...X-H                                            |        | 0.49   |       |
| Cl <sub>2</sub> PO-X...X-H                              | 0.87   | 1.11   | 1.10  |
| O <sub>2</sub> N-X...X-H                                | 1.26   | 1.95   | 2.42  |
| MeOCO-X...X-H                                           | 0.47   | 0.56   | 0.33  |
| F <sub>3</sub> Si-X...X-H                               | 0.42   |        | 0.32  |
| F <sub>3</sub> Si-X...X-H                               | 0.41   | 0.58   |       |
| H <sub>3</sub> Si-X...X-H                               |        | 0.19   |       |
| H <sub>2</sub> FSi-X...X-H                              |        | 0.26   |       |
| HF <sub>2</sub> Si-X...X-H                              |        | 0.35   |       |
| HFP-X...X-H                                             | 0.26   |        |       |
| F <sub>2</sub> P-X...X-H                                | 0.38   |        | 0.02  |
| F <sub>2</sub> B-X...X-H                                |        | 0.42   | 0.14  |
| PhO-X...X-H                                             | 1.55   | 2.08   | 2.90  |
| F-PhO-X...X-H                                           | 1.26   | 2.17   | 3.06  |
| H <sub>2</sub> NPh-O-X...X-H                            | 1.18   | 1.94   | 1.91  |

|                                            |      |      |       |
|--------------------------------------------|------|------|-------|
| PhNH-X...X-H                               |      | 1.34 | 1.19  |
| Ph <sub>2</sub> N-X...X-H                  |      |      | 1.40  |
| F-PhNH-X...X-H                             |      | 1.37 | 1.23  |
| MePhNH-X...X-H                             |      | 1.15 | 1.07  |
| FPhPhN-X...X-H                             |      |      | 1.30  |
| p-FPh <sub>2</sub> N-Cl...Cl-H             | 0.72 | 1.38 | 1.38  |
| F-PhMe-PhN-X...X-H                         |      |      | 1.23  |
| MePh <sub>2</sub> N-X...X-H                |      |      | 1.04  |
| H <sub>2</sub> B-X...X-H                   |      | 0.20 |       |
| HFB-X...X-H                                |      | 0.28 | -0.05 |
| MeSO <sub>2</sub> -X...X-H                 | 0.18 | 0.60 | 0.52  |
| F <sub>3</sub> CSO-X...X-H                 | 0.58 |      |       |
| F <sub>3</sub> CSO-X...X-H                 | 0.49 | 0.93 | 0.85  |
| NCSO-X...X-H                               | 0.66 | 1.12 | 1.30  |
| ClSO-X...X-H                               | 0.51 | 0.90 | 0.83  |
| F <sub>2</sub> PO-X...X-H                  | 0.74 | 1.16 | 1.18  |
| H <sub>2</sub> PO-X...X-H                  | 0.18 |      |       |
| HFPO-X...X-H                               | 0.53 | 0.66 | 0.43  |
| CH <sub>2</sub> N-X...X-H                  | 0.45 | 0.76 | 0.73  |
| F <sub>2</sub> CN-X...X-H                  | 1.19 |      |       |
| F <sub>2</sub> CN-X...X-H                  | 1.00 | 1.68 | 2.04  |
| NC-X...X-H                                 | 1.21 | 1.64 | 1.78  |
| FCH=CH-X...X-H                             |      |      | 0.31  |
| F <sub>2</sub> CCH-X...X-H                 | 0.43 |      | 0.71  |
| o-F <sub>2</sub> Ph-X...X-H                | 0.42 | 0.57 | 0.53  |
| p,o-F <sub>3</sub> Ph-Cl...Cl-H            | 0.49 | 0.65 | 0.66  |
| o-F <sub>2</sub> Ph-O-X...X-H              | 1.55 | 2.39 | 3.10  |
| p,o-F <sub>3</sub> Ph-O-Cl...Cl-H          | 1.59 | 2.45 | 3.30  |
| C <sub>6</sub> F <sub>5</sub> -O-X...X-H   | 1.82 | 2.84 | 4.11  |
| F <sub>3</sub> C <sub>2</sub> PO-X...X-H   | 0.87 | 1.10 | 0.99  |
| ClCC-X...X-H                               | 0.78 | 1.14 | 1.17  |
| F <sub>3</sub> CCC-Cl...Cl-H               | 1.04 | 1.42 | 1.53  |
| F <sub>2</sub> C=CF-X...X-H                | 0.75 |      |       |
| F <sub>2</sub> CCF-X...X-H                 | 0.70 | 0.95 | 1.00  |
| NCCH <sub>2</sub> -X...X-H                 |      | 0.73 | 0.75  |
| NC <sub>2</sub> CH-X...X-H                 | 1.00 | 1.48 | 1.74  |
| NC <sub>3</sub> C-X...X-H                  | 1.36 | 2.02 | 2.99  |
| F <sub>3</sub> CCH=CH-X...X-H              |      |      | 0.59  |
| F <sub>3</sub> C <sub>2</sub> C=CH-X...X-H |      |      | 1.12  |
| p-NCPh-X...X-H                             | 0.50 | 0.57 | 0.46  |
| o-NC <sub>2</sub> Ph-X...X-H               | 0.61 | 0.92 | 1.14  |
| p,o-NC <sub>3</sub> Ph-X...X-H             | 0.78 | 0.92 | 1.24  |
| NC <sub>5</sub> Ph-X...X-H                 | 1.10 | 1.44 | 2.02  |
| F-X...X-F                                  | 1.10 | 2.32 | 2.47  |
| Cl-X...X-F                                 | 0.71 | 1.25 | 1.63  |
| Br-X...X-F                                 | 0.40 | 1.08 | 1.55  |
| HO-X...X-F                                 | 0.73 | 1.25 | 1.17  |
| H <sub>2</sub> N-X...X-F                   | 0.35 | 0.54 | 0.08  |
| H-X...X-F                                  |      | 0.25 |       |

|                                                         |      |      |       |
|---------------------------------------------------------|------|------|-------|
| Me-X...X-F                                              |      | 0.22 | -0.13 |
| FH <sub>2</sub> C-X...X-F                               | 0.25 | 0.04 | -0.20 |
| FH <sub>2</sub> C-X...X-F                               |      |      | 0.03  |
| F <sub>2</sub> HC-X...X-F                               | 0.39 | 0.21 | 0.13  |
| F <sub>3</sub> C-X...X-F                                | 0.31 | 0.22 | 0.19  |
| MeH <sub>2</sub> C-X...X-F                              | 0.40 | 0.21 | -0.23 |
| Me <sub>2</sub> HC-X...X-F                              | 0.39 | 0.24 | -0.30 |
| Me <sub>3</sub> C-X...X-F                               | 0.38 | 0.25 | -0.34 |
| CH <sub>2</sub> =CH-X...X-F                             | 0.37 | 0.18 | -0.12 |
| HCC-X...X-F                                             | 0.38 | 0.36 | 0.24  |
| Ph-X...X-F                                              | 0.34 | 0.25 | -0.11 |
| C <sub>6</sub> F <sub>5</sub> -X...X-F                  | 0.40 |      |       |
| C <sub>6</sub> F <sub>5</sub> -X...X-F                  | 0.29 | 0.31 | 0.23  |
| H <sub>2</sub> N-Ph-X...X-F                             | 0.33 | 0.29 | -0.06 |
| F-Ph-X...X-F                                            | 0.35 | 0.25 | -0.03 |
| CHO-X...X-F                                             |      | 0.16 |       |
| CMeO-X...X-F                                            |      | 0.29 |       |
| MeCC-X...X-F                                            | 0.34 | 0.36 | 0.22  |
| FCC-X...X-F                                             | 0.33 | 0.37 | 0.31  |
| MeO-X...X-F                                             | 0.65 | 1.11 | 0.97  |
| Me <sub>2</sub> N-X...X-F                               | 0.53 | 0.65 | 0.12  |
| C <sub>6</sub> OH <sub>2</sub> F <sub>2</sub> H-X...X-F |      | 0.38 |       |
| NCSO <sub>2</sub> -X...X-F                              |      | 0.54 | 0.81  |
| ClSO <sub>2</sub> -X...X-F                              | 0.43 | 0.50 | 0.89  |
| H <sub>2</sub> NSO <sub>2</sub> -X...X-F                | 0.45 | 0.36 | 0.35  |
| F <sub>3</sub> CSO <sub>2</sub> -X...X-F                | 0.37 | 0.36 | 0.55  |
| MeSO-X...X-F                                            |      | 0.34 | -0.04 |
| Cl <sub>2</sub> PO-X...X-F                              | 0.38 | 0.25 | 0.08  |
| O <sub>2</sub> N-X...X-F                                | 0.56 | 0.88 | 0.91  |
| MeOCO-X...X-F                                           | 0.26 |      | -0.13 |
| F <sub>3</sub> Si-X...X-F                               | 0.20 |      | -0.23 |
| H <sub>3</sub> Si-X...X-F                               |      | 0.16 |       |
| H <sub>2</sub> FSi-X...X-F                              |      | 0.04 | -0.14 |
| HF <sub>2</sub> Si-X...X-F                              | 0.18 |      | -0.04 |
| H <sub>2</sub> P-X...X-F                                |      | 0.34 | -0.09 |
| HFP-X...X-F                                             |      | 0.32 | -0.08 |
| F <sub>2</sub> P-X...X-F                                |      | 0.16 | -0.02 |
| F <sub>2</sub> B-X...X-F                                |      | 0.16 |       |
| F <sub>2</sub> B-X...X-F                                |      | 0.04 |       |
| Ph-O-X...X-F                                            | 0.68 | 1.23 | 1.40  |
| F-PhO-X...X-F                                           | 0.71 | 1.11 | 1.27  |
| H <sub>2</sub> N-Ph-O-X...X-F                           | 0.57 | 0.96 | 0.83  |
| PhNH-X...X-F                                            | 0.43 | 0.49 | 0.33  |
| Ph <sub>2</sub> N-X...X-F                               | 0.43 | 0.65 |       |
| F-PhNH-X...X-F                                          | 0.44 | 0.47 | 0.37  |
| MePhNH-X...X-F                                          | 0.47 | 0.49 | 0.32  |
| FPhPhN-X...X-F                                          | 0.42 |      | 0.33  |
| FPh <sub>2</sub> N-X...X-F                              | 0.42 | 0.61 | 0.36  |
| FPhMePhN-X...X-F                                        | 0.39 | 0.61 |       |



|                                            |      |       |       |
|--------------------------------------------|------|-------|-------|
| MePh <sub>2</sub> N-X...X-F                | 0.42 | 0.63  |       |
| H <sub>2</sub> B-X...X-F                   |      |       | -0.29 |
| HFB-X...X-F                                |      | 0.06  |       |
| HOHB-X...X-F                               |      | -0.08 |       |
| MeSO <sub>2</sub> -X...X-F                 |      | 0.05  | 0.47  |
| F <sub>3</sub> CSO-X...X-F                 | 0.53 | 0.42  | 0.34  |
| NCSO-X...X-F                               | 0.58 | 0.59  | 0.59  |
| CISO-X...X-F                               |      | 0.46  | 0.36  |
| F <sub>2</sub> PO-X...X-F                  | 0.20 | 0.17  | 0.19  |
| H <sub>2</sub> PO-X...X-F                  |      | 0.42  |       |
| HFPO-X...X-F                               | 0.29 | 0.01  | -0.26 |
| Me <sub>2</sub> P-X...X-F                  | 0.45 |       | -0.22 |
| ON-X...X-F                                 | 0.39 | 0.26  | -0.20 |
| H <sub>2</sub> CN-X...X-F                  | 0.30 | 0.36  | 0.20  |
| F <sub>2</sub> C=N-X...X-F                 | 0.44 | 0.71  | 0.69  |
| Me <sub>2</sub> C=N-X...X-F                |      | 0.25  |       |
| NC-X...X-F                                 |      | 0.56  | 0.49  |
| CHF=CH-X...X-F                             | 0.44 | 0.32  | 0.09  |
| F <sub>2</sub> C=CH-X...X-F                | 0.30 | 0.22  | 0.17  |
| o-F <sub>2</sub> Ph-X...X-F                | 0.37 | 0.31  | 0.30  |
| p,o-F <sub>3</sub> Ph-X...X-F              | 0.35 | 0.32  | 0.21  |
| o-F <sub>2</sub> Ph-O-X...X-F              | 0.61 | 1.10  | 1.33  |
| p,o-F <sub>3</sub> Ph-O-X...X-F            | 0.73 | 1.29  | 1.59  |
| C <sub>6</sub> F <sub>5</sub> O-X...X-F    | 0.81 | 1.50  | 1.92  |
| ClCC-X...X-F                               | 0.33 | 0.32  | 0.28  |
| F <sub>3</sub> CCC-X...X-F                 | 0.32 | 0.47  | 0.42  |
| F <sub>2</sub> C=CF-X...X-F                | 0.30 | 0.27  | 0.13  |
| NCCH <sub>2</sub> -X...X-F                 | 0.49 | 0.32  | 0.05  |
| NC <sub>2</sub> CH-X...X-F                 |      |       | 0.47  |
| NC <sub>2</sub> CH-X...X-F                 | 0.42 | 0.48  | 0.48  |
| NC <sub>3</sub> C-X...X-F                  |      | 0.83  | 0.91  |
| F <sub>3</sub> CCH=CH-X...X-F              |      | 0.24  | 0.39  |
| F <sub>3</sub> C <sub>2</sub> C=CH-X...X-F |      | 0.45  | 0.39  |
| p-NCPh-X...X-F                             |      | 0.22  | 0.02  |
| o-NC <sub>2</sub> Ph-X...X-F               |      | 0.32  | 0.21  |
| p,o-NC <sub>3</sub> Ph-X...X-F             |      | 0.33  | 0.30  |
| NC <sub>5</sub> Ph-X...X-F                 |      | 0.61  | 0.46  |
| F-X...X-F                                  | 1.10 | 2.32  | 2.47  |
| F-X...X-Cl                                 | 1.68 | 3.03  | 3.20  |
| F-X...X-Br                                 | 1.89 | 3.02  | 3.50  |
| F-X...X-OH                                 | 2.48 | 4.22  | 4.62  |
| F-X...X-NH <sub>2</sub>                    | 3.38 | 5.19  | 6.27  |
| F-X...X-H                                  | 2.51 | 3.95  | 4.84  |
| F-X...X-Me                                 | 4.07 | 6.27  | 7.31  |
| F-X...X-CH <sub>2</sub> F                  | 2.98 | 5.10  | 5.84  |
| F-X...X-CHF <sub>2</sub>                   | 2.24 | 4.05  | 4.64  |
| F-X...X-CF <sub>3</sub>                    | 1.42 | 2.77  | 3.44  |
| F-X...X-CH <sub>2</sub> Me                 | 4.24 | 6.45  | 7.83  |
| F-X...X-CHMe <sub>2</sub>                  | 4.73 |       |       |

|                                                         |      |      |      |
|---------------------------------------------------------|------|------|------|
| F-X...X-CMe <sub>3</sub>                                | 5.01 |      |      |
| F-X...X-CH=CH <sub>2</sub>                              | 3.16 | 4.99 |      |
| F-X...X-CCH                                             | 1.49 | 2.72 | 3.20 |
| F-X...X-Ph                                              | 3.39 | 5.08 | 6.25 |
| F-X...X-C <sub>6</sub> F <sub>5</sub>                   | 2.15 | 3.01 | 3.68 |
| F-X...X-PhNH <sub>2</sub>                               | 3.84 | 5.73 |      |
| F-X...X-PhF                                             | 3.20 | 4.79 | 5.86 |
| F-X...X-CHO                                             | 2.52 |      | 5.45 |
| F-X...X-CMeO                                            | 2.93 |      | 6.81 |
| F-X...X-CCMe                                            | 1.98 | 3.47 | 4.41 |
| F-X...X-CCF                                             | 1.54 | 2.81 | 3.24 |
| F-X...X-OMe                                             | 3.08 | 4.94 |      |
| F-X...X-NMe <sub>2</sub>                                | 3.95 | 5.83 |      |
| F-X...X-C <sub>6</sub> F <sub>2</sub> OH <sub>2</sub> H | 2.24 | 3.03 | 3.86 |
| F-X...X-SO <sub>2</sub> CN                              | 0.56 | 1.48 | 1.51 |
| F-X...X-SO <sub>2</sub> Cl                              | 1.33 | 2.27 | 2.38 |
| F-X...X-SO <sub>2</sub> NH <sub>2</sub>                 |      | 3.50 | 4.26 |
| F-X...X-SO <sub>2</sub> CF <sub>3</sub>                 | 1.30 | 2.34 | 2.26 |
| F-X...X-SMeO                                            | 3.69 | 5.86 |      |
| F-X...X-POCl <sub>2</sub>                               | 1.30 | 2.40 | 2.60 |
| F-X...X-NO <sub>2</sub>                                 | 1.40 | 2.34 |      |
| F-X...X-COOMe                                           | 2.65 |      | 6.02 |
| F-X...X-SiF <sub>3</sub>                                | 1.34 | 2.29 | 2.00 |
| F-X...X-SiMe <sub>3</sub>                               | 4.79 | 7.10 | 9.24 |
| F-X...X-SiH <sub>3</sub>                                | 3.34 | 5.24 | 6.35 |
| F-X...X-SiH <sub>2</sub> F                              | 2.56 | 4.10 | 4.79 |
| F-X...X-SiHF <sub>2</sub>                               | 2.02 | 2.92 | 3.14 |
| F-X...X-PH <sub>2</sub>                                 | 3.28 | 5.28 | 6.18 |
| F-X...X-PHF                                             | 2.62 | 4.32 | 5.17 |
| F-X...X-PF <sub>2</sub>                                 | 2.06 | 3.89 | 4.53 |
| F-X...X-BF <sub>2</sub>                                 | 1.36 | 2.53 | 2.72 |
| F-X...X-O-Ph                                            | 2.82 | 3.98 |      |
| F-X...X-O-PhF                                           | 2.96 | 3.76 |      |
| F-X...X-O-PhNH <sub>2</sub>                             | 3.52 |      | 7.48 |
| F-X...X-NHPh                                            | 3.55 | 5.52 |      |
| F-X...X-NPh <sub>2</sub>                                | 3.71 |      |      |
| F-X...X-NHPhF                                           | 3.60 |      |      |
| F-X...X-NHPhMe                                          | 3.74 |      |      |
| F-X...X-NPhPhF                                          | 3.61 |      |      |
| F-X...X-NPhF <sub>2</sub>                               | 3.48 |      | 6.32 |
| F-X...X-NPhFPhMe                                        | 3.65 |      |      |
| F-X...X-NPhMe <sub>2</sub>                              | 3.88 |      |      |
| F-X...X-BH <sub>2</sub>                                 | 1.98 | 3.67 |      |
| F-X...X-BHF                                             | 2.35 | 3.53 | 4.92 |
| F-X...X-BHOH                                            | 2.80 | 4.30 | 5.55 |
| F-X...X-SO <sub>2</sub> Me                              | 2.73 |      |      |
| F-X...X-SOCF <sub>3</sub>                               | 2.11 | 3.27 | 4.00 |
| F-X...X-SOCN                                            | 1.74 |      |      |
| F-X...X-SOCl                                            | 2.27 | 3.89 | 4.53 |

|                                             |      |      |      |
|---------------------------------------------|------|------|------|
| F-X...X-POF <sub>2</sub>                    | 0.69 | 1.56 | 1.40 |
| F-X...X-POH <sub>2</sub>                    |      |      | 5.38 |
| F-X...X-POH <sub>2</sub>                    | 2.13 | 3.63 | 4.25 |
| F-X...X-POHF                                | 1.50 | 2.86 |      |
| F-X...X-PMe <sub>2</sub>                    | 4.17 | 6.30 | 7.79 |
| F-X...X-NO                                  | 3.73 | 6.03 |      |
| F-X...X-NCH <sub>2</sub>                    | 3.20 | 5.31 | 5.89 |
| F-X...X-N=CF <sub>2</sub>                   | 2.22 | 3.68 | 3.88 |
| F-X...X-N=CMe <sub>2</sub>                  | 3.58 | 5.46 | 7.25 |
| F-X...X-CN                                  | 0.20 | 0.94 | 1.13 |
| F-X...X-CH=CHF                              | 2.98 | 4.57 | 5.87 |
| F-X...X-CH=CF <sub>2</sub>                  | 2.68 | 4.12 | 4.89 |
| F-X...X-PhF <sub>2</sub> -o                 | 2.79 | 4.08 | 5.15 |
| F-X...X-PhF <sub>3</sub> -p,o               | 2.65 | 3.75 | 4.81 |
| F-X...X-O-PhF <sub>2</sub> -o               | 2.38 | 3.30 | 4.64 |
| F-X...X-O-PhF <sub>3</sub> -p,o             | 2.04 | 3.02 | 4.43 |
| F-X...X-O-C <sub>6</sub> F <sub>5</sub>     | 1.63 | 2.42 | 2.89 |
| F-X...X-PO(CF <sub>3</sub> ) <sub>2</sub>   | 0.86 | 1.54 | 1.70 |
| F-X...X-CCCl                                | 1.39 | 2.63 | 3.25 |
| F-X...X-CCCF <sub>3</sub>                   | 0.65 | 1.58 | 1.90 |
| F-X...X-CF=CF <sub>2</sub>                  | 1.80 | 2.88 | 3.33 |
| F-X...X-CH <sub>2</sub> CN                  | 2.78 | 4.31 | 5.07 |
| F-X...X-CHCN <sub>2</sub>                   | 1.96 |      |      |
| F-X...X-CCN <sub>3</sub>                    | 1.24 |      | 1.49 |
| F-X...X-CH=CHCF <sub>3</sub>                | 2.43 | 3.83 | 4.29 |
| F-X...X-CH=C(CF <sub>3</sub> ) <sub>2</sub> | 1.74 | 2.69 | 3.14 |
| F-X...X-PhCN-p                              | 2.73 | 4.00 |      |
| F-X...X-PhCN <sub>2</sub> -o                | 2.23 | 3.26 | 3.75 |
| F-X...X-PhCN <sub>3</sub> -p,o              | 1.81 | 2.56 | 2.62 |
| F-X...X-PhCN <sub>5</sub>                   |      | 1.82 | 1.37 |

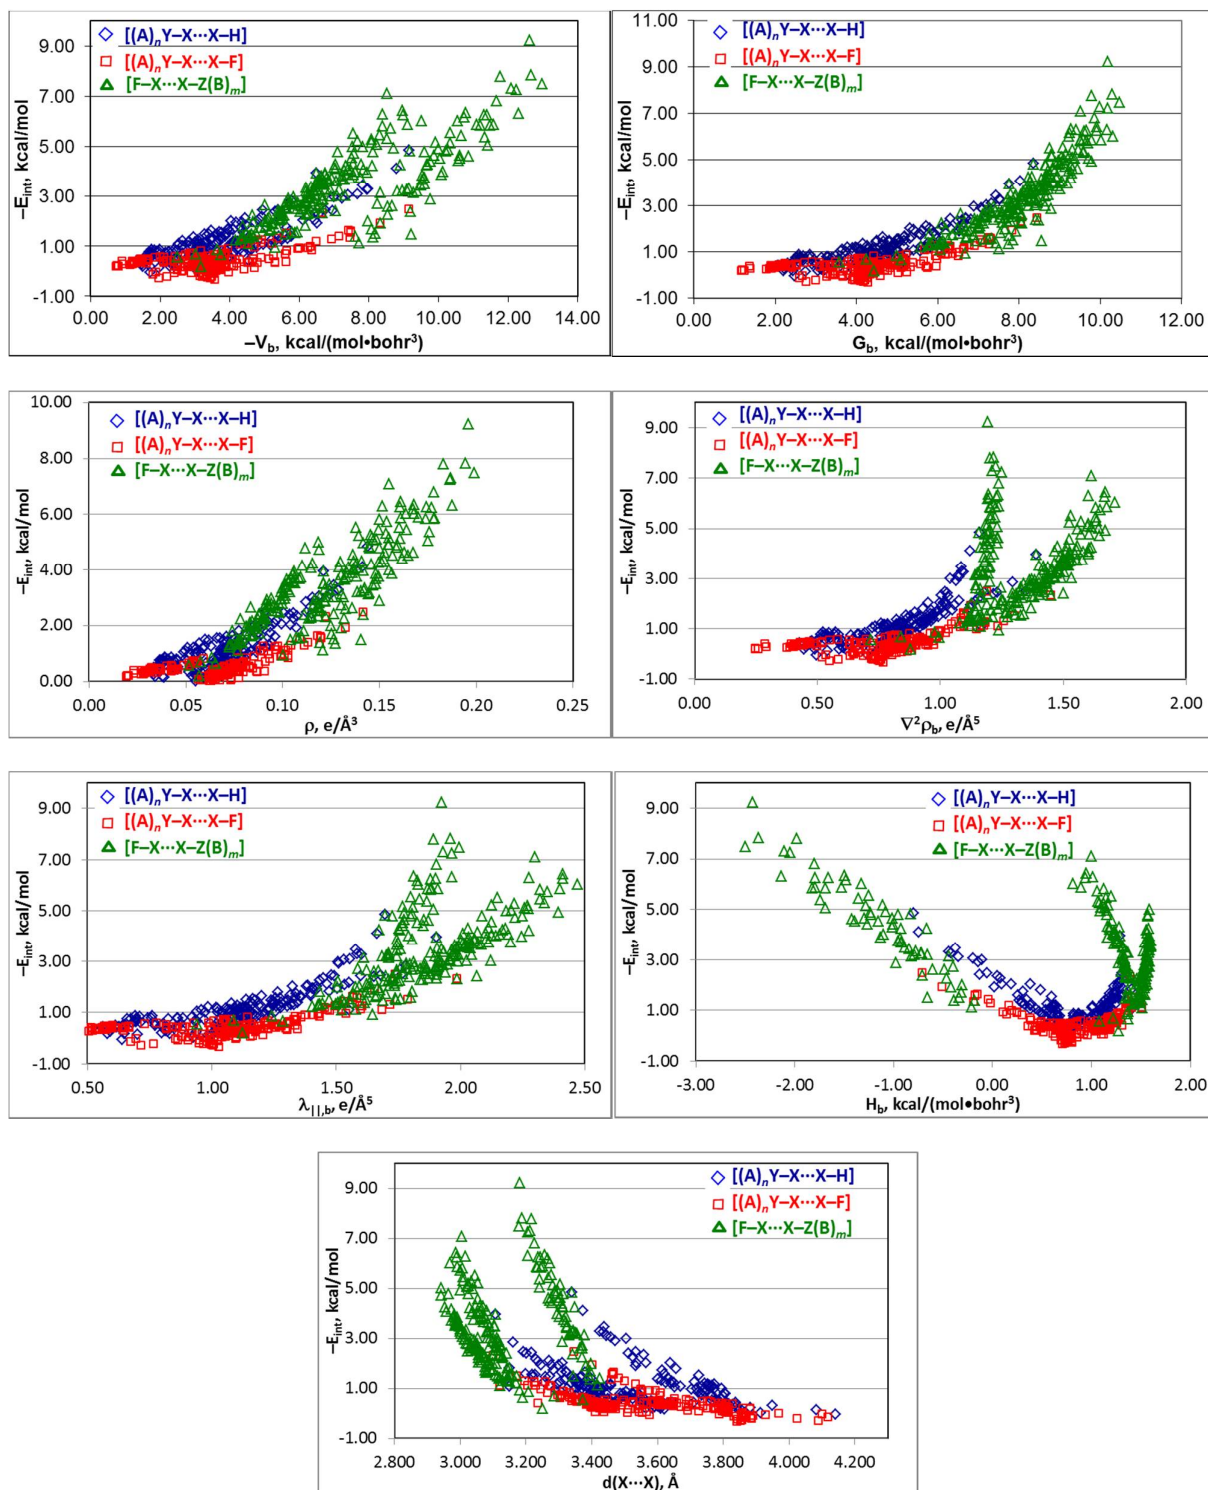

**Figure S1.** Plots of  $-E_{\text{int}}$  against  $-V_b$ ,  $G_b$ ,  $\rho_b$ ,  $\nabla^2 \rho_b$ ,  $\lambda_{\parallel,b}$ ,  $H_b$  and  $d(X\cdots X)$  for the series  $[(A)_n Y-X\cdots X-H]$ ,  $[(A)_n Y-X\cdots X-F]$  and  $[F-X\cdots X-Z(B)_m]$ .

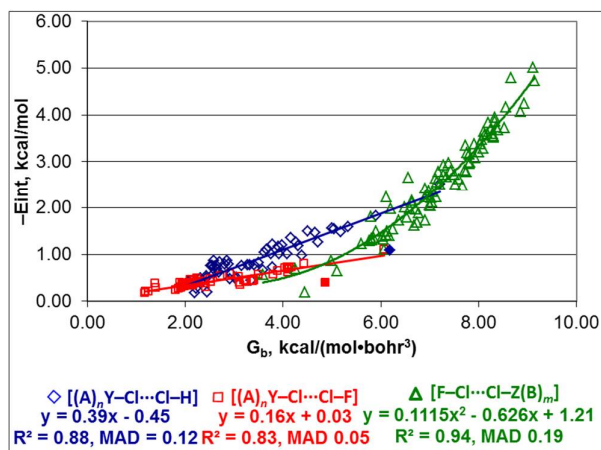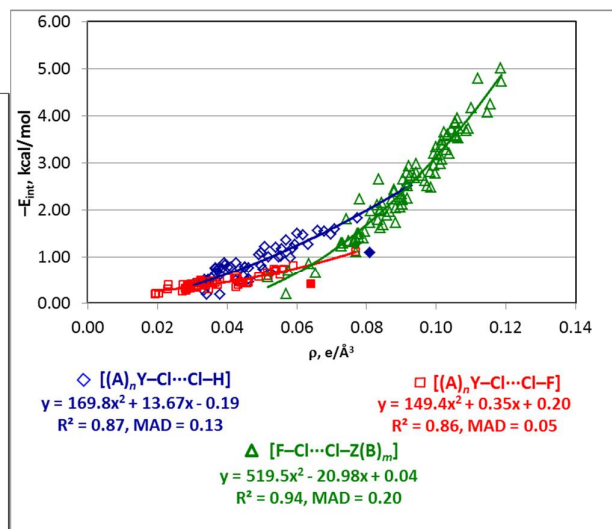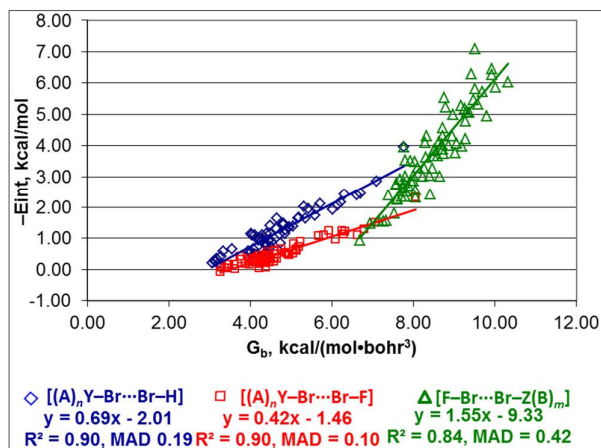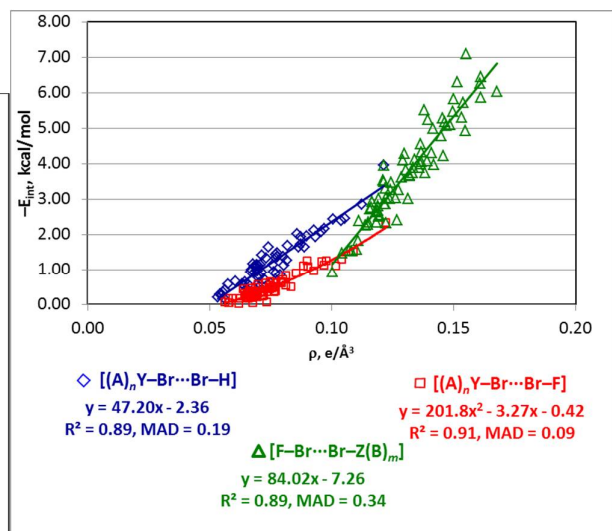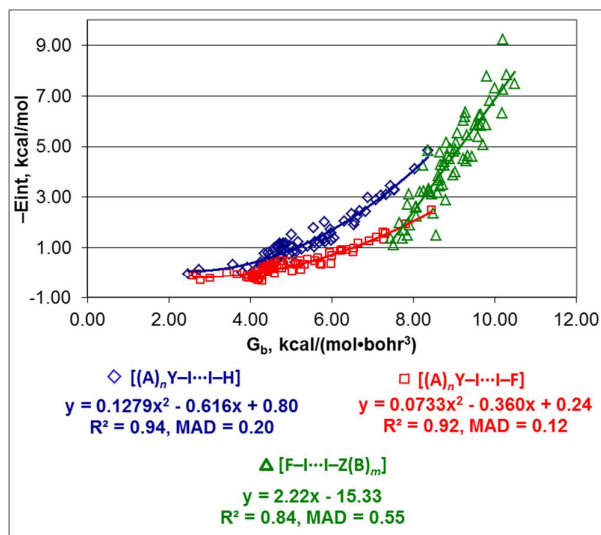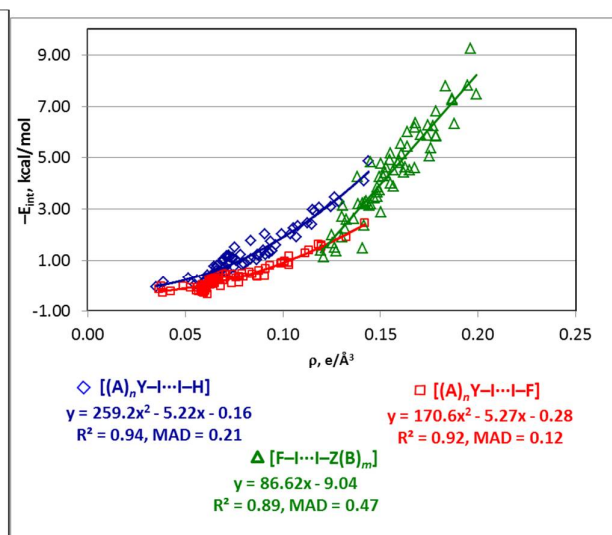

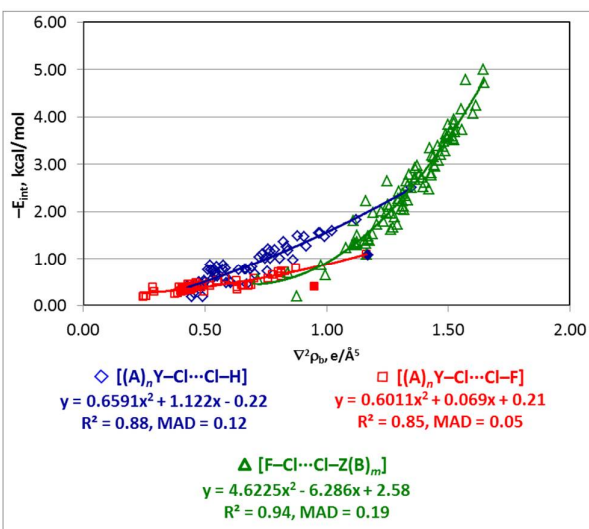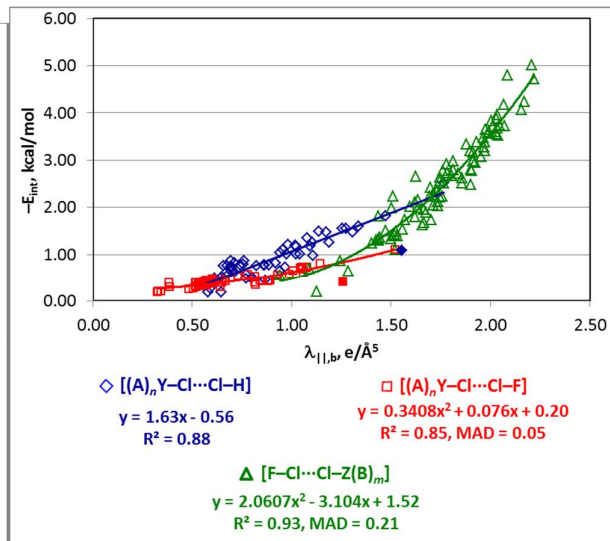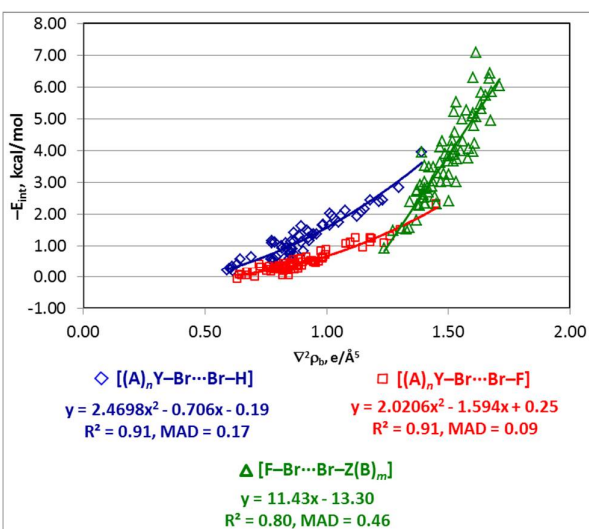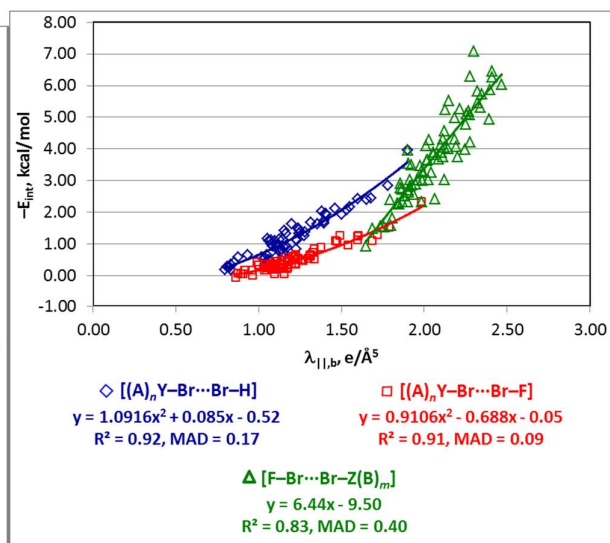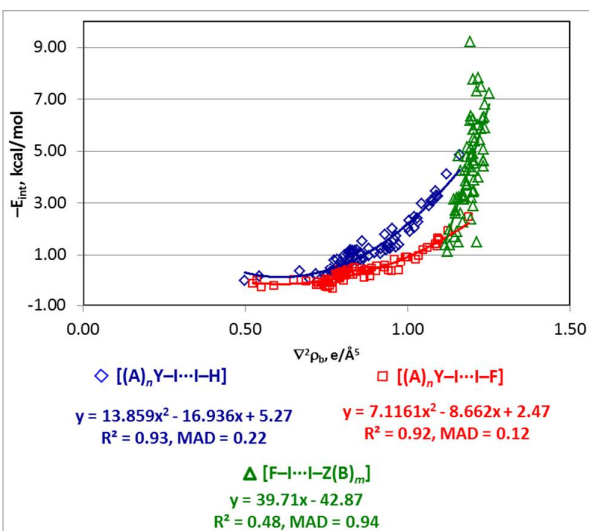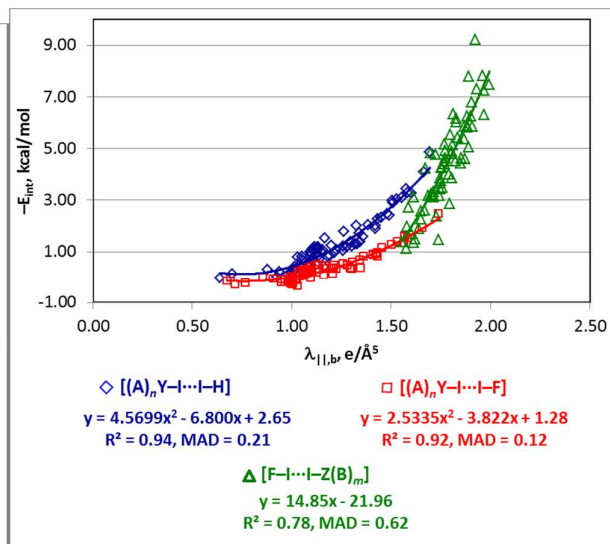



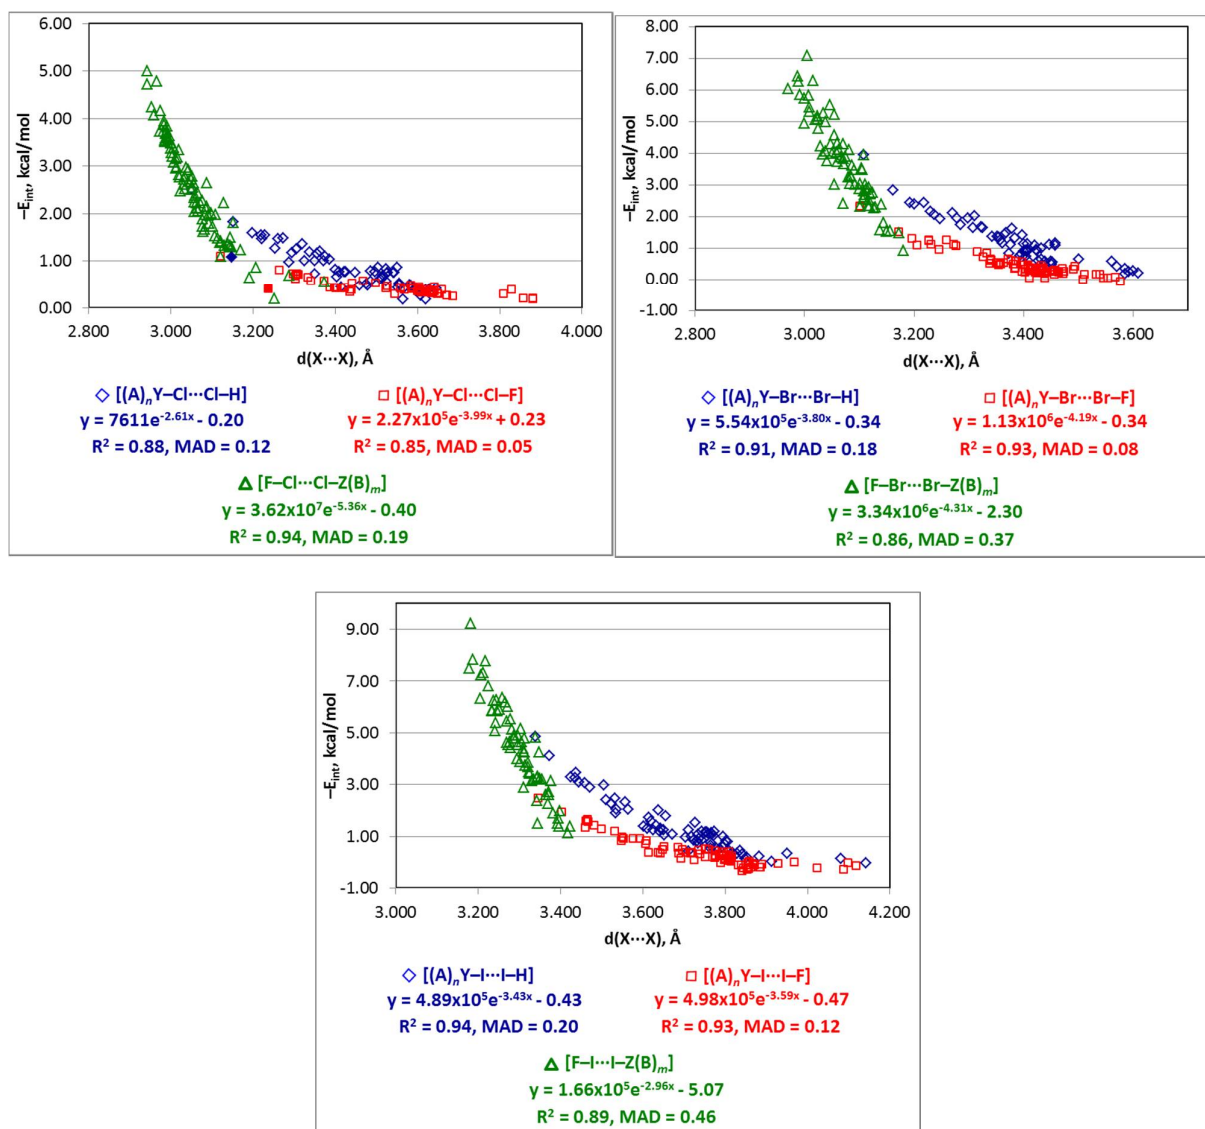

**Figure S2.** Plots of  $-E_{\text{int}}$  against  $G_b$ ,  $\rho_b$ ,  $\nabla^2\rho_b$ ,  $\lambda_{||,b}$  and  $d(\text{X}\cdots\text{X})$  for the “small” series of structures  $[(A)_n\text{Y-X}\cdots\text{X-Z(B)}_m]$  (structures  $\text{Br-Cl}\cdots\text{Cl-H}$  and  $\text{Br-Cl}\cdots\text{Cl-F}$  are not included in the fittings).

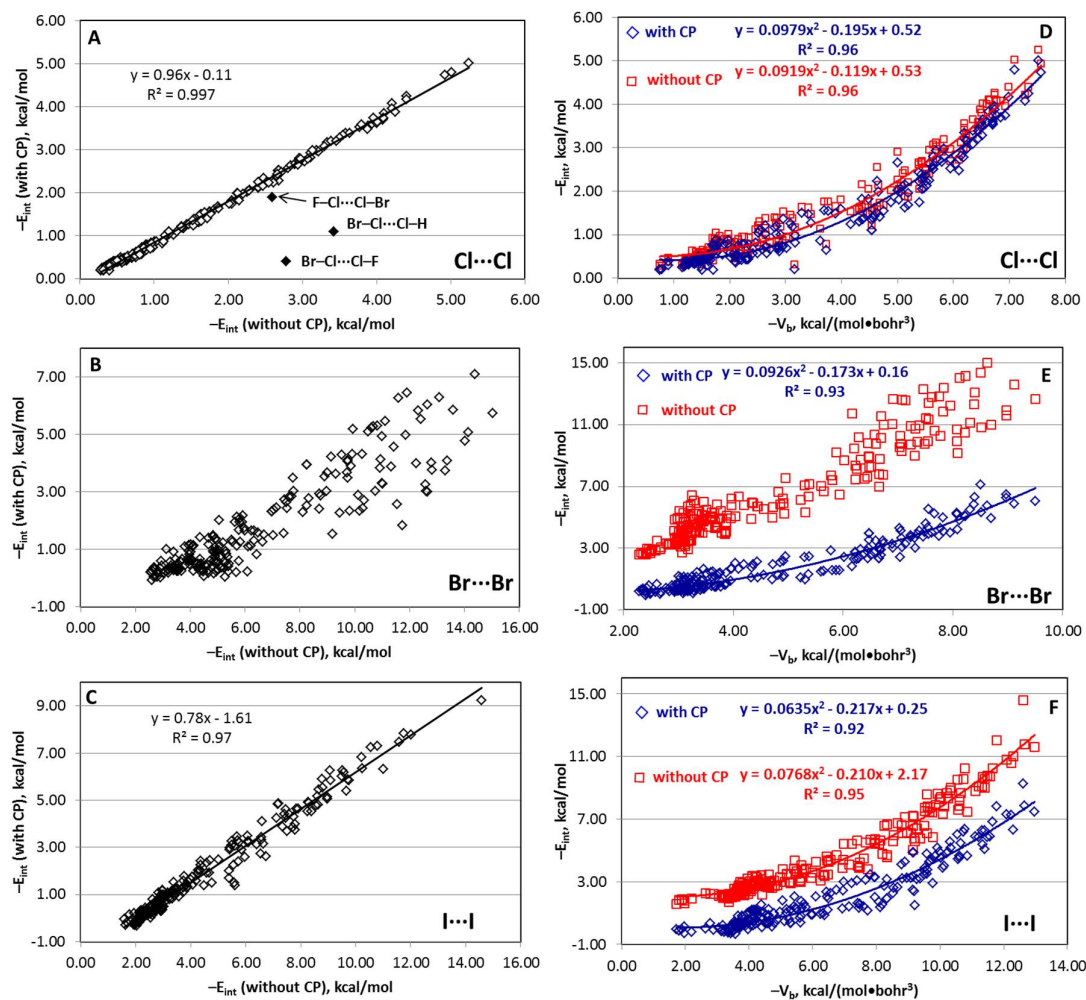

**Figure S3.** Plots of  $-E_{\text{int}}$  with the CP correction against  $-E_{\text{int}}$  without the CP correction (A–C) and plots of  $-E_{\text{int}}$  with and without the CP correction against  $-V_b$  (D–F) for the “large” series of structures  $[(A)_n Y-X\cdots X-Z(B)_m]$ . Points corresponding to structures  $\text{Br-Cl}\cdots\text{Cl-H}$ ,  $\text{Br-Cl}\cdots\text{Cl-F}$ , and  $\text{F-Cl}\cdots\text{Cl-Br}$  are not included in the fittings in parts A and D.
